# Supplementary material
Source: PubMed Central journal article supplement (PMC4018098)
Supplement: es5001352_si_001.pdf [file es5001352_si_001.pdf]

**Detection and Occurrence of *N*-Nitrosamines in Archived Biosolids from the 2006-7 Targeted National Sewage Sludge Survey of the U.S. Environmental Protection Agency**

Arjun K. Venkatesan, Benny F.G. Pycke, Rolf U. Halden

Pages 7

Supplemental Figures (2)

Supplemental Tables (3)

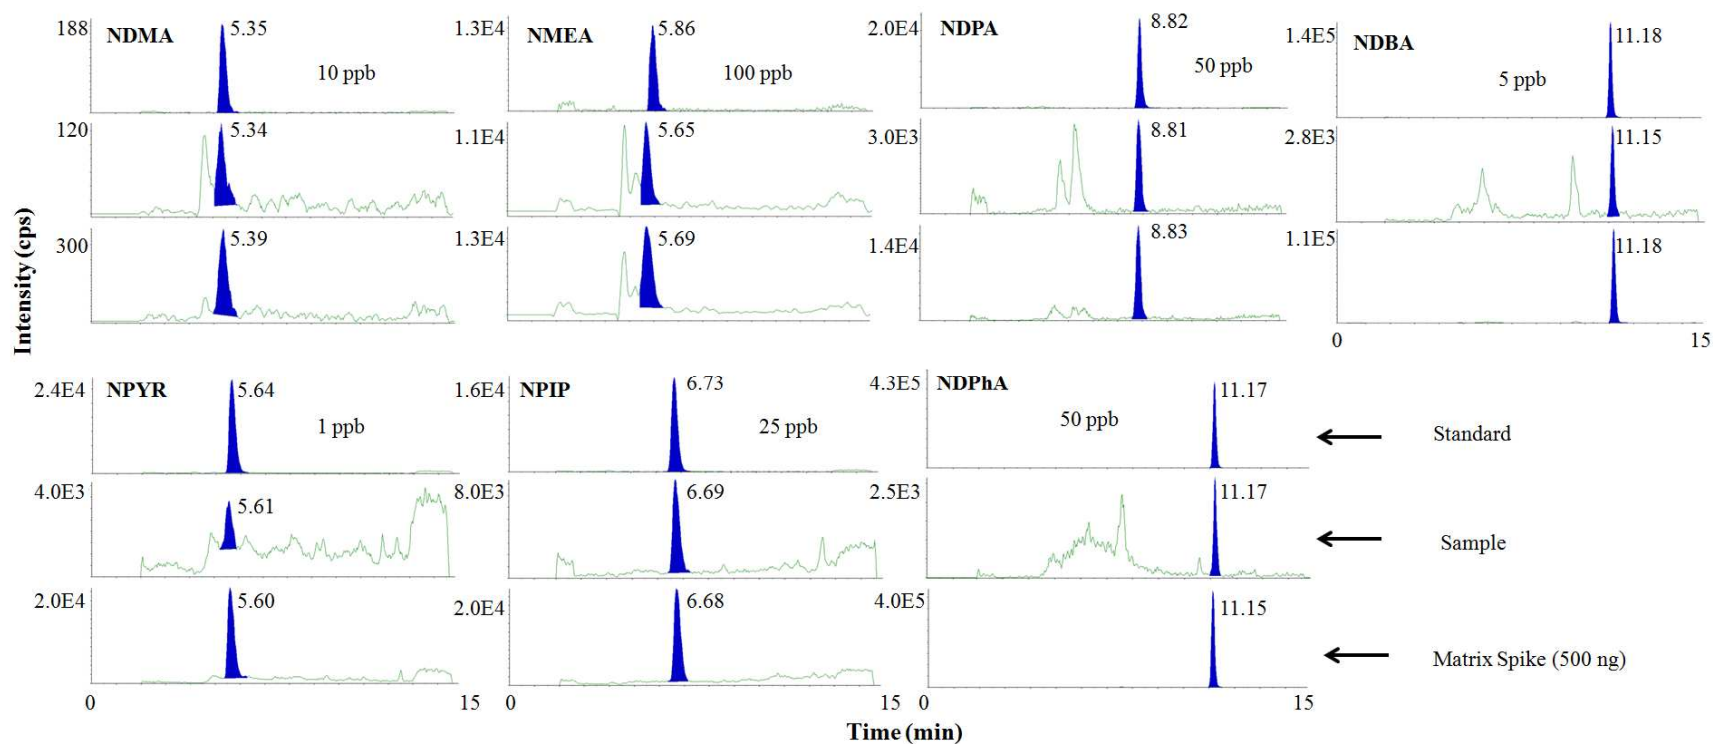

**Figure S1.** LC-MS/MS chromatograms of standards, sample extracts and matrix spike samples of seven detected *N*-nitrosamines. Number next to the peak represent the retention time of the analyte in minutes.

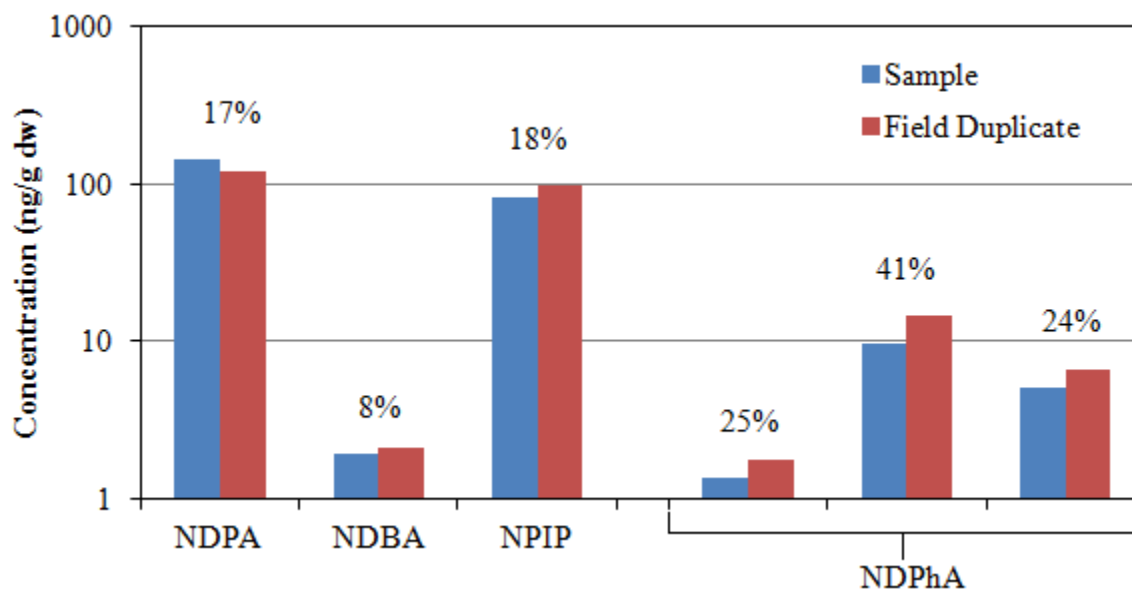

**Figure S2.** Concentrations of nitrosamines detected in samples and field duplicates. The percentage above the bar is the relative percentage difference (RPD) of the respective analyte concentration between sample and field duplicate.

**Table S1.** List of wastewater treatment plants (WWTPs) sampled for the targeted national sewage sludge survey by U.S. EPA

| <b>WWTP</b>                            | <b>Flow (F) in MGD</b> | <b>City</b>    | <b>State</b> |
|----------------------------------------|------------------------|----------------|--------------|
| Sugar Creek WWTP                       | 1<F<10                 | Alexander City | AL           |
| Aldridge Creek WWTP                    | 1<F<10                 | Huntsville     | AL           |
| Phoenix WWTP                           | 10<F<100               | Phoenix        | AZ           |
| Valley Sanitary District STP           | 1<F<10                 | Indio          | CA           |
| San Francisco                          | F>100                  | San Francisco  | CA           |
| El Estero WWTP                         | 1<F<10                 | Santa Barbara  | CA           |
| Santa Rosa                             | 1<F<10                 | Santa Rosa     | CA           |
| Stockton Water Quality Plant           | F>100                  | Stockton       | CA           |
| Los Angeles County Sanitation District | 10<F<100               | Whittier       | CA           |
| Boulder WWTP                           | 1<F<10                 | Boulder        | CO           |
| South Windsor                          | 1<F<10                 | South Windsor  | CT           |
| Three Oaks WWTF                        | 1<F<10                 | Estero         | FL           |
| Orange County Northwest WRF            | 1<F<10                 | Orlando        | FL           |
| Tampa                                  | 1<F<10                 | Tampa          | FL           |
| Albany                                 | 10<F<100               | Albany         | GA           |
| Americus-Mill Creek                    | 1<F<10                 | Americus       | GA           |
| Boone STP                              | 1<F<10                 | Boone          | IA           |
| Calumet Water Reclamation Plant        | F>100                  | Chicago        | IL           |
| Plainfield WWTP                        | 1<F<10                 | Plainfield     | IL           |
| Lake County DPW, New Century STP       | 1<F<10                 | Vernon Hills   | IL           |
| Dupage County-Knollwood STP            | 1<F<10                 | Wheaton        | IL           |
| Blucher Poole WWTP                     | 1<F<10                 | Bloomington    | IN           |
| William Ross Edwin WWTP                | 10<F<100               | Richmond       | IN           |
| Parsons                                | 1<F<10                 | Parsons        | KS           |
| Topeka                                 | 10<F<100               | Topeka         | KS           |
| Mayfield WWTP                          | 1<F<10                 | Mayfield       | KY           |
| Eunice                                 | 1<F<10                 | Eunice         | LA           |
| Jefferson Parish East Bank WWTP        | 1<F<10                 | Marrero        | LA           |
| Nantucket                              | 1<F<10                 | Nantucket      | MA           |
| Salisbury                              | 1<F<10                 | Salisbury      | MD           |
| Mechanic Falls Treatment Plant         | 1<F<10                 | Mechanic Falls | ME           |
| Benton Harbor-St. Joseph WWTP          | 1<F<10                 | St. Joseph     | MI           |
| Wixom WTP                              | 1<F<10                 | Wixom          | MI           |
| Festus Crystal City STP                | 1<F<10                 | Crystal City   | MO           |
| Elizabeth City WWTP                    | 1<F<10                 | Elizabeth City | NC           |
| Hillsborough WWTP                      | 1<F<10                 | Hillsborough   | NC           |
| Beatrice                               | 1<F<10                 | Beatrice       | NE           |

|                                                     |          |                      |    |
|-----------------------------------------------------|----------|----------------------|----|
| Wildwood Lower WTF                                  | 10<F<100 | Cape May Court House | NJ |
| Middlesex County Utility Authority WRC              | F>100    | Sayreville           | NJ |
| Verona TWP DPW                                      | 1<F<10   | Verona               | NJ |
| Buffalo                                             | F>100    | Buffalo              | NY |
| Canajoharie WWTP                                    | 1<F<10   | Canajoharie          | NY |
| Geneva A-C Marsh Creek STP                          | 1<F<10   | Geneva               | NY |
| NYC DEP - Jamaica WPCP                              | 10<F<100 | New York City        | NY |
| North Tonawanda STP                                 | 1<F<10   | North Tonawanda      | NY |
| Clermont County Commissioners                       | 1<F<10   | Batavia              | OH |
| Bedford                                             | 1<F<10   | Bedford              | OH |
| Metropolitan Sewer District Little Miami            | 10<F<100 | Cincinnati           | OH |
| Northeast Ohio Regional Sewerage District Southerly | F>100    | Cleveland            | OH |
| Delaware County Alum Creek WWTP                     | 1<F<10   | Delaware             | OH |
| Mingo Junction STP                                  | 1<F<10   | Mingo Junction       | OH |
| Duncan Public Utilities Authority                   | 1<F<10   | Duncan               | OK |
| City of Klamath Falls WWTF                          | 1<F<10   | Klamath Falls        | OR |
| Western Westmoreland Municipal Authority            | 1<F<10   | Irwin                | PA |
| Allegheny County Sanitary Authority                 | 1<F<10   | Pittsburgh           | PA |
| Greater Pottsville Area Sewer Authority             | 1<F<10   | Pottsville           | PA |
| Punxsutawney                                        | 1<F<10   | Punxsutawney         | PA |
| South Kingstown WWTF                                | 1<F<10   | Narragansett         | RI |
| Plum Island WWTP                                    | 10<F<100 | Charleston           | SC |
| Lawson Fork WTP                                     | 1<F<10   | Spartanburg          | SC |
| Elizabethton                                        | 1<F<10   | Elizabethton         | TN |
| Amarillo                                            | 10<F<100 | Amarillo             | TX |
| Dallas Southside WWTP                               | F>100    | Dallas               | TX |
| Trinity River Authority of Texas                    | 1<F<10   | Ellis County         | TX |
| Fredericksburg                                      | 1<F<10   | Fredericksburg       | TX |
| Odo J. Riedel Regional WWTP                         | 1<F<10   | Schertz              | TX |
| Wagner Creek WWTP                                   | 1<F<10   | Texarkana            | TX |
| Tyler Southside WTP                                 | 1<F<10   | Tyler                | TX |
| Spanish Fork City Corporation                       | 1<F<10   | Spanish Fork         | UT |
| Buena Vista                                         | 1<F<10   | Buena Vista          | VA |
| Everett City SVC Center MVD                         | 10<F<100 | Everett              | WA |
| Beaver Dam                                          | 1<F<10   | Beaver Dam           | WI |
| Elkins WWTP                                         | 1<F<10   | Elkins               | WV |
| Huntington                                          | 10<F<100 | Huntington           | WV |

**Table S2.** LC-ESI-MS/MS parameters for analysis of *N*-nitrosamines

| <b>MS/MS parameter</b> |                                  |
|------------------------|----------------------------------|
| Ion source             | Positive electrospray ionization |
| Collision Gas          | 6                                |
| Curtain Gas            | 50                               |
| Ion source Gas 1       | 80                               |
| Ion Source Gas 2       | 70                               |
| Ion Spray Voltage      | 4500 V                           |
| Source Gas Temperature | 700 °C                           |

  

| <b>Analyte</b>             | <b>Parent ion (m/z)</b> | <b>Product ion (m/z)</b> | <b>Declustering potential (V)</b> | <b>Exit Potential (V)</b> | <b>Collision Energy (V)</b> | <b>Collision Cell Exit Potential (V)</b> | <b>Retention Time (min)</b> |
|----------------------------|-------------------------|--------------------------|-----------------------------------|---------------------------|-----------------------------|------------------------------------------|-----------------------------|
| NDMA                       | 75                      | 43                       | 51                                | 10                        | 25                          | 2                                        | 5.34                        |
| NMEA                       | 89                      | 61                       | 51                                | 10                        | 17                          | 10                                       | 5.86                        |
| NDEA                       | 103                     | 75                       | 51                                | 10                        | 17                          | 12                                       | 6.65                        |
| NDPA <sup>a</sup>          | 131                     | 89                       | 51                                | 10                        | 17                          | 8                                        | 8.82                        |
|                            | 131                     | 43                       |                                   |                           |                             |                                          |                             |
| NDBA <sup>a</sup>          | 159                     | 103                      | 56                                | 10                        | 17                          | 8                                        | 11.18                       |
|                            | 159                     | 57                       |                                   |                           |                             |                                          |                             |
| NPYR                       | 101                     | 55                       | 61                                | 10                        | 23                          | 8                                        | 5.64                        |
| NPIP <sup>a</sup>          | 115                     | 69                       | 61                                | 10                        | 23                          | 12                                       | 6.73                        |
|                            | 115                     | 41                       |                                   |                           |                             |                                          |                             |
| NDPhA <sup>a</sup>         | 199                     | 169                      | 56                                | 10                        | 17                          | 8                                        | 11.16                       |
|                            | 199                     | 168                      |                                   |                           |                             |                                          |                             |
| <b>Deuterated isotopes</b> |                         |                          |                                   |                           |                             |                                          |                             |
| NDMA-d <sub>6</sub>        | 81                      | 46                       | 51                                | 10                        | 25                          | 2                                        | 5.35                        |
| NDPA-d <sub>14</sub>       | 145                     | 50                       | 51                                | 10                        | 17                          | 8                                        | 8.76                        |
| NPIP-d <sub>10</sub>       | 125                     | 78                       | 61                                | 10                        | 23                          | 12                                       | 6.70                        |
| NDPhA-d <sub>6</sub>       | 205                     | 175                      | 56                                | 10                        | 17                          | 8                                        | 11.11                       |

<sup>a</sup>Two different transitions were used for these analytes for quantification and identification

**Table S3.** Octanol-water partitioning coefficient of nitrosamines (source: SciFinder).

| <b>Compound</b> | <b>Log <math>K_{ow}</math></b> |
|-----------------|--------------------------------|
| NDMA            | -0.5                           |
| NMEA            | 0.01                           |
| NDEA            | 0.51                           |
| NDPA            | 1.54                           |
| NDBA            | 2.56                           |
| NPYR            | -0.1                           |
| NPIP            | 0.44                           |
| NDPhA           | 3.13                           |
